# Supplementary material for: Comparative and Temporal Characterization of LPS and Blue-Light-Induced TLR4 Signal Transduction and Gene Expression in Optogenetically Manipulated Endothelial Cells
Source: MDPI journal article supplement (doi:10.3390/cells12050697), 2023-02-22
Supplement: s1 [file s1]

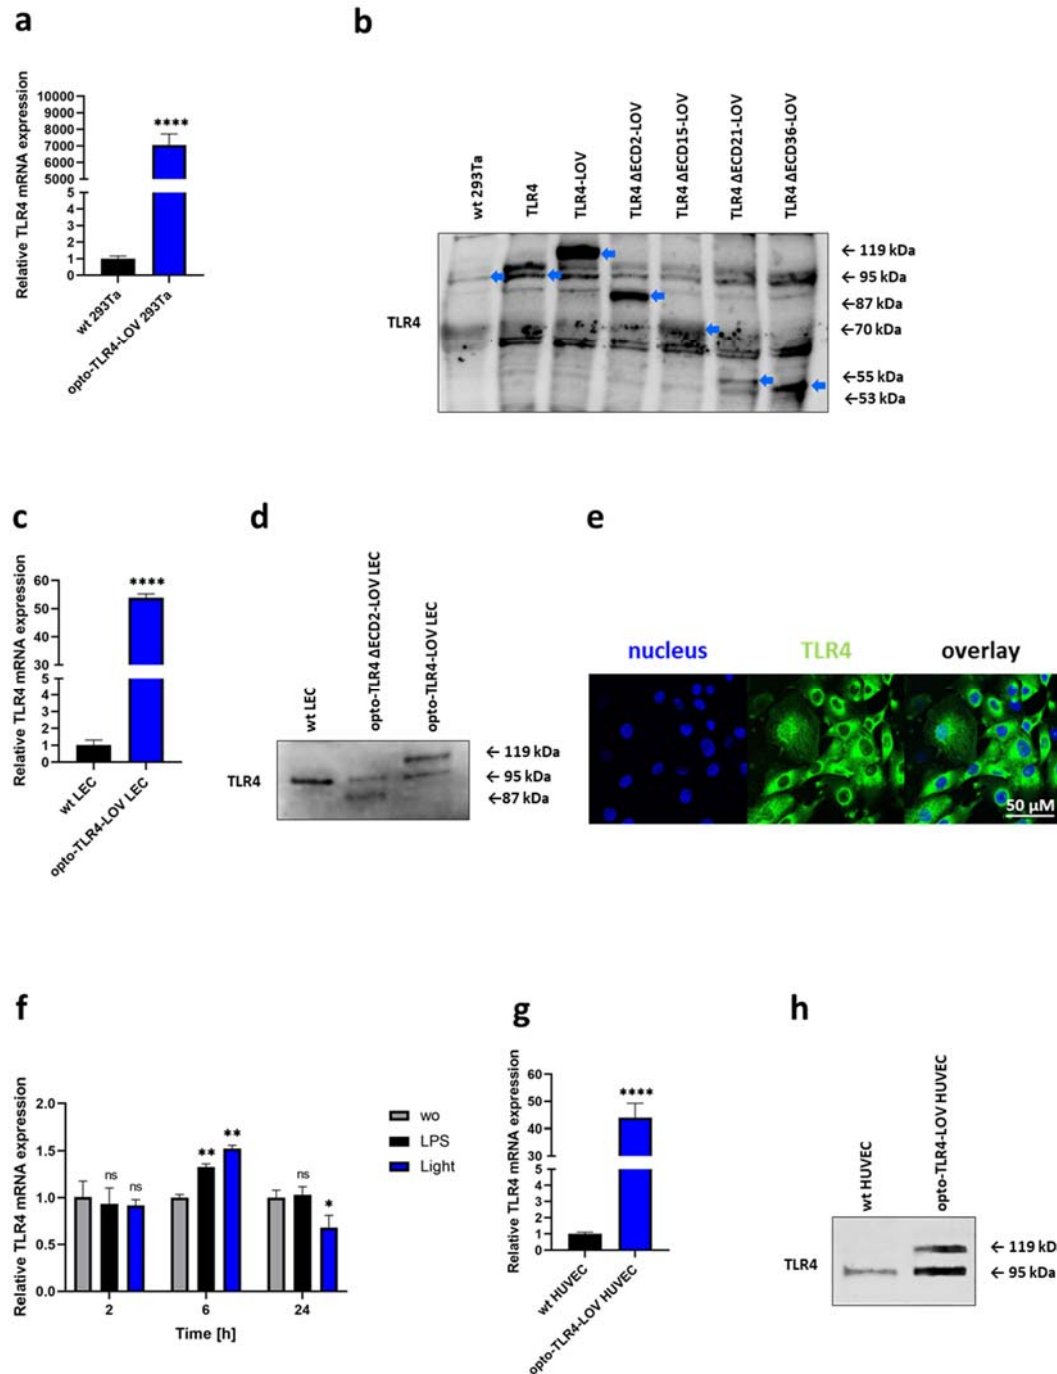

**Figure S1.** TLR4-LOV construct expression analysis. Relative TLR4 mRNA expression of (a) wild-type 293Ta cells or 293Ta cells transiently transfected with the TLR4-LOV construct, (c) wild-type LEC or LEC with stable incorporated TLR4-LOV construct, (f) opto-TLR4-LOV LEC 2 h, 6 h and 24 h post LPS (100 ng/mL) or blue light (470 nm) stimulation, or no treatment, and (g) wild-type HUVEC or HUVEC with stable incorporated TLR4-LOV construct was calculated according to the comparative CT method ( $2^{-\Delta\Delta CT}$ ). (a, c, g) Mean values  $\pm$  standard deviation were graphically displayed in bar charts ( $n=3$ ) and relatively compared to the control using Student's t-test (ns=not significant, \* $p<0.05$ , \*\* $p<0.01$ , \*\*\* $p<0.001$ , \*\*\*\* $p<0.0001$ ). (b, d, h) Western Blot analysis of TLR4 protein expression of (b) wild-type 293Ta cells, 293Ta cells transiently transfected with the TLR4, TLR4-LOV or TLR4  $\Delta$ ECD2/15/21/36-LOV construct using the calcium phosphate precipitation technique, (d) wild-type LEC or LEC with stable incorporated TLR4-LOV or TLR4  $\Delta$ ECD2-LOV construct using a lentiviral transfection system, and (h) wild-type HUVEC or HUVEC with stable incorporated TLR4-LOV construct using a lentiviral transfection system. (e) Representative confocal laser scanning microscopy showing TLR4 localization of opto-TLR4-LOV LEC. TLR4 was stained using rabbit anti-TLR4 as the primary antibody and AF488 conjugated goat anti-rabbit IgG as the secondary antibody (green). Cell nuclei were stained using Hoechst 33342 (blue). Scale bar=50  $\mu$ m.

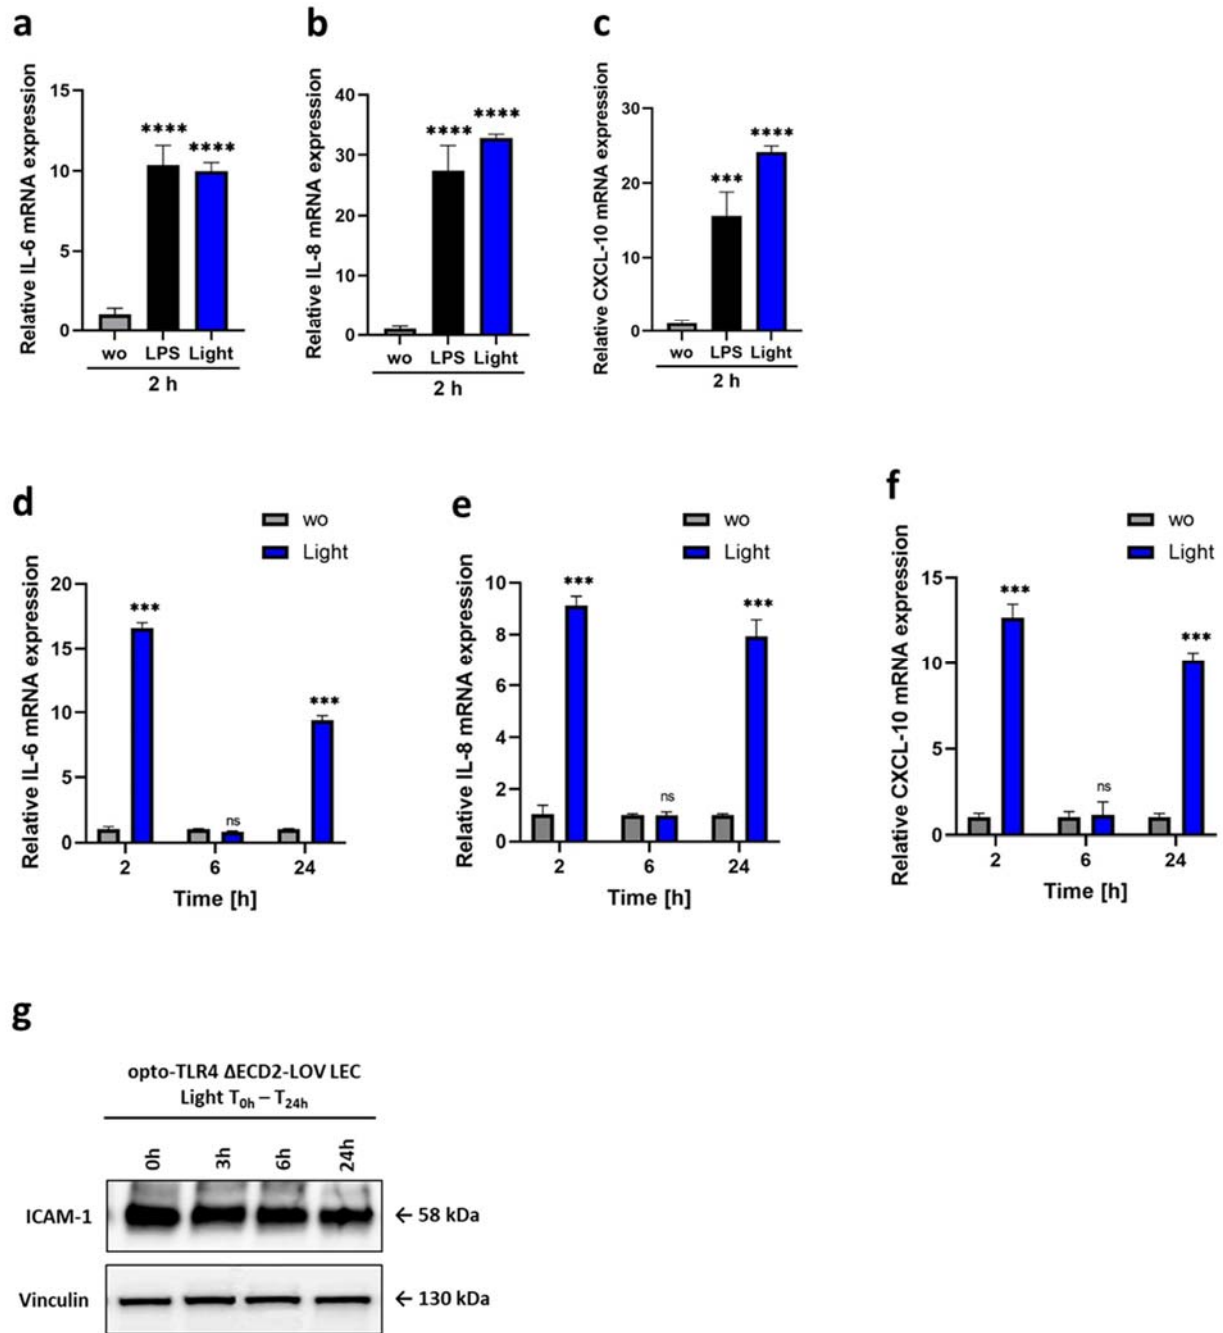

**Figure S2.** Pro-inflammatory gene expression analysis. Relative IL-6, IL-8 and CXCL-10 mRNA expression in (a-c) opto-TLR4-LOV HUVEC 2 h post and (d-f) opto-TLR4  $\Delta$ ECD2-LOV LEC 2 h, 6 h post blue light (470 nm) stimulation. The mRNA target gene expression levels were calculated according to the comparative CT method ( $2^{-\Delta\Delta CT}$ ). Mean values  $\pm$  standard deviation were graphically displayed in bar charts (n=3). Post-ANOVA multiple comparisons relative to the control were per-formed using Dunnett's test (ns=not significant, \*\*p<0.01, \*\*\*p<0.001, \*\*\*\*p<0.0001). (g) Western Blots of opto-TLR4  $\Delta$ ECD2-LOV LEC illuminated with blue light (470 nm) for 0-24 h. Whole-cell extracts were probed with antibodies against ICAM-1 and vinculin as a loading control.

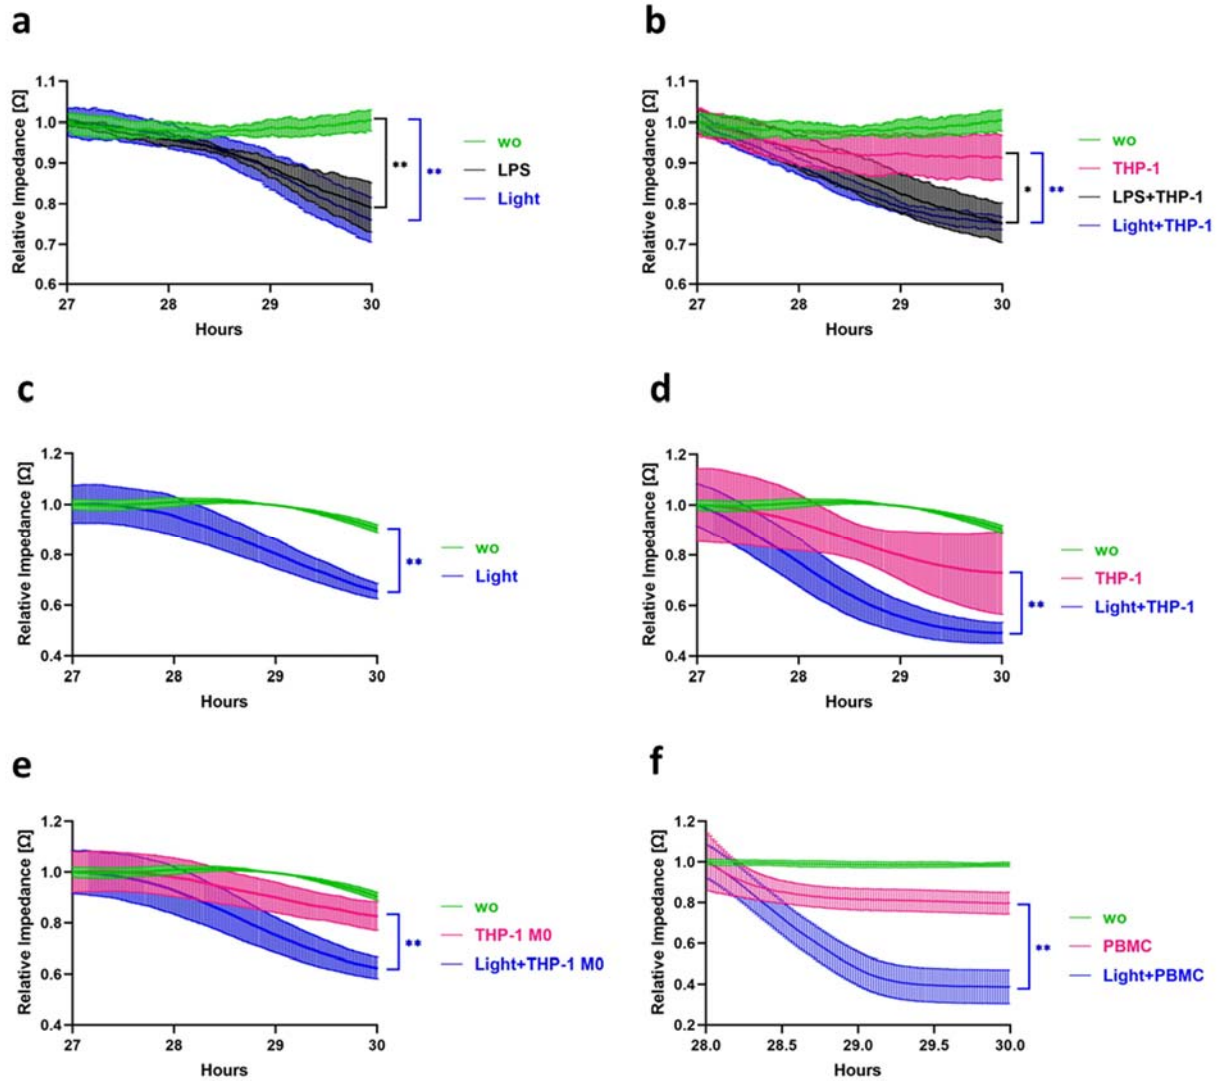

**Figure S3.** Trans-endothelial migration analysis. LPS-, blue-light- and monocytic-cell-line-induced EC monolayer breakdown in (a, b) opto-TLR4-LOV HUVEC and (c-f) opto-TLR4  $\Delta$ ECD2-LOV LEC. ECs were seeded onto ECIS arrays (96W20idf PET) and allowed to grow to a monolayer before being treated with (a) LPS (100 ng/mL), blue light (470 nm) or left untreated or (c) blue light (470 nm) or left untreated. Addition of 50,000 (b, d) THP-1 cells/well, (e) THP-1 M0 cells/well, or (f) PBMCs/well. (a-f) Changes in endothelial monolayer resistance, which is proportional to endothelial barrier function, were recorded in real time using the ECIS system (9600Z) and mean values  $\pm$  standard deviation (n=8) were plotted in a time-curve diagram. Post-ANOVA multiple comparisons relative to the control three hours after treatment ( $T_{30h}$ ) were performed using Dunnett's test (\* $p$ <0.05, \*\* $p$ <0.01).

**Table S1.** Temporal proteomics data. Protein level quantification of supernatant of opto-TLR4-LOV LEC 2 h, 6 h and 16 h post LPS (100 ng/mL) or blue light (470 nm) stimulation. List of LFQ intensities and significant regulations are extracted from Perseus. Missing values have been re-placed by imputation using a normal distribution with a width of 0.3 and a down shift of 1.8 to enable statistical testing. Volcano plots and the respective significant proteins were determined using a two-sided T-test with an FDR=0.05 and an S0=0.1. Significantly regulated proteins are marked in the corresponding column and the -log(p-value) and the difference are stated for each pairwise comparison of WO vs. LPS. WO vs. light and LPS vs. light for 2, 6 and 16 hours. WO=without treatment.
